# Supplementary material for: A randomized controlled trial of AMH-based individualized FSH dosing in a GnRH antagonist protocol for IVF
Source: PubMed Central journal article supplement — Hum Reprod Open. 2019 Feb 27;2019(1):hoz003. doi: 10.1093/hropen/hoz003 (PMC6396645; doi:10.1093/hropen/hoz003), 2019-02-27
Supplement: hoz003_supplementary_figure_s1.pdf [file hoz003_supplementary_figure_s1.pdf]

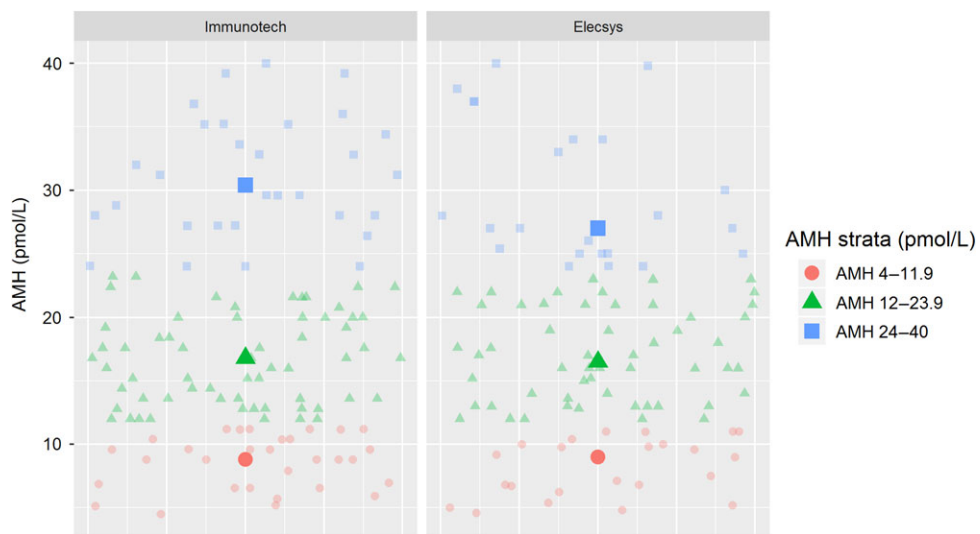

**Supplementary Figure S1** Dispersion of values from each assay per AMH strata (larger shapes represents the stratum median). AMH, anti-Müllerian hormone.
