# Supplementary material for: A randomized controlled trial of AMH-based individualized FSH dosing in a GnRH antagonist protocol for IVF
Source: PubMed Central journal article supplement — Hum Reprod Open. 2019 Feb 27;2019(1):hoz003. doi: 10.1093/hropen/hoz003 (PMC6396645; doi:10.1093/hropen/hoz003), 2019-02-27
Supplement: hoz003_supplementary_figure_s2.pdf [file hoz003_supplementary_figure_s2.pdf]

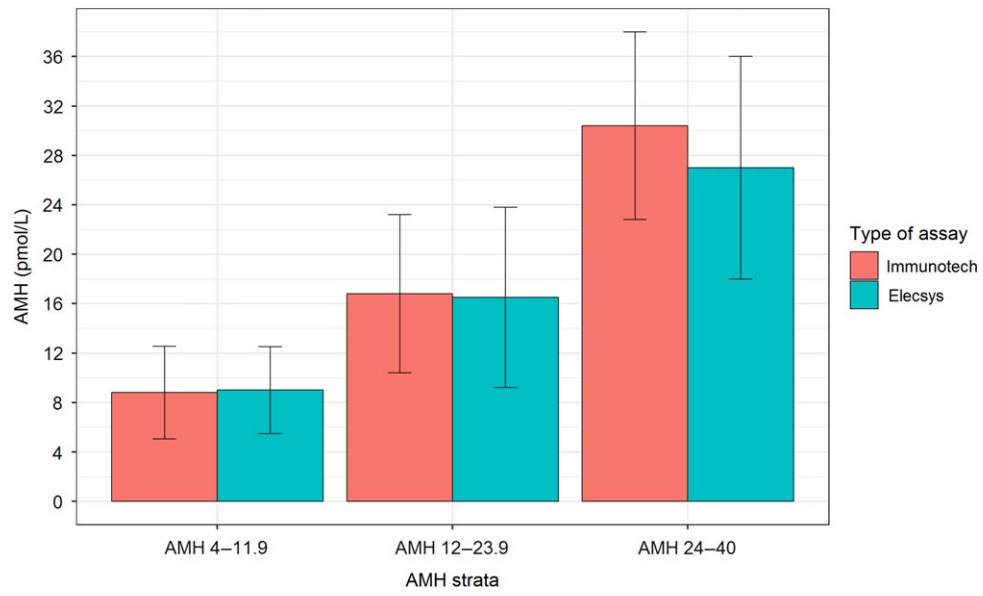

**Supplementary Figure S2** Median AMH values and IQR per assay of the predefined strata. IQR, Inter-quartile range.
